# Supplementary material for: The Contribution of Attentional Bias to Negative Information to Social Anxiety-Linked Heightened State Anxiety During a Social Event
Source: Springer Nature journal article supplement (doi:10.1007/s10608-023-10389-2), 2023-05-26
Supplement: MOESM1 [file 25407586]

**Conflict of Interest**

The authors declare that they have no conflict of interest.
